# Supplementary material
Source: Research Square preprint supplement (doi:10.21203/rs.3.rs-9672444/v1)
Supplement: Supplementary file 1 [file 8b953590a2741af4e58b0d68.pdf]

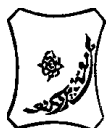

## Department of Plant Science and Biotechnology

Bayero University, Kano.

### Herbarium Plant Identification Form

Name of inquirer: Prof. Abdulrahman Lado, Faculty of Agriculture Bayero Univ. Kano.

| S/<br>N | Family  | Scientific Name                 | Common Name             | Local name   | Accession No. |
|---------|---------|---------------------------------|-------------------------|--------------|---------------|
|         |         |                                 | <b><u>(GRASSES)</u></b> |              |               |
| 1       | Poaceae | <i>Axonopus compressus</i>      | Carpetgrass             | Ciyawar fili | BUKHAN0658    |
| 2       | Poaceae | <i>Chloris pilosa</i>           | Hairy chloris           |              | BUKHAN0425    |
| 3       | Poaceae | <i>Cynodon dactylon</i>         | Bermuda grass           | Kiri-kiri    | BUKHAN0241    |
| 4       | Poaceae | <i>Dactyloctenium aegyptium</i> | Egyptian crowfoot grass | Gude-gude    | BUKHAN0325    |
| 5       | Poaceae | <i>Digitaria ciliaris</i>       | Southern crab grass     |              | BUKHAN0242    |
| 6       | Poaceae | <i>Digitaria horizontalis</i>   | Jamaican crabgrass      |              | BUKHAN0323    |
| 7       | Poaceae | <i>Echinochloa obtusiflora</i>  | Cockspur grass          |              | BUKHAN0328    |
| 8       | Poaceae | <i>Eleusine indica</i>          | Indian goosegrass       | Tuji         | BUKHAN0320    |
| 9       | Poaceae | <i>Elytrophorus spicatus</i>    | Spikegrass              |              | BUKHAN0685    |
| 10      | Poaceae | <i>Eragrostis ciliaris</i>      | Gophertail lovegrass    | Kumbura kama | BUKHAN0322    |
| 11      | Poaceae | <i>Imperata cylindrical</i>     | Cogongrass              | Tofa         | BUKHAN0582    |
| 12      | Poaceae | <i>Leptochloa filiformis</i>    | Red sprangletop         | Rigar biri   | BUKHAN0008    |
| 13      | Poaceae | <i>Oryza stiva</i>              | Asian rice              | Shinkafa     | BUKHAN0289    |
| 14      | Poaceae | <i>Oryza barthii</i>            | African wild rice       |              | BUKHAN0421    |
| 15      | Poaceae | <i>Paspalum scrobiculatum</i>   | Kodo millet             |              | BUKHAN0330    |

|    |               |                                |                                               |                   |            |
|----|---------------|--------------------------------|-----------------------------------------------|-------------------|------------|
| 16 | Poaceae       | <i>Pennisetum pedicellatum</i> | Desho grass                                   | Kyasuwa           | BUKHAN0333 |
| 17 | Poaceae       | <i>Pennisetum polystachion</i> | Mission grass                                 |                   | BUKHAN0433 |
| 18 | Poaceae       | <i>Saterea barbata</i>         | Corn grass                                    | Gwambada wari     | BUKHAN0495 |
| 19 | Poaceae       | <i>Sporobolus pyramidalis</i>  | Giant rat's tail grass                        | Tsintsiyar laushi | BUKHAN0394 |
| 20 | Poaceae       | <i>Triticum aestivum</i>       | Common wheat                                  | Alkama            | BUKHAN0398 |
| 21 | Poaceae       | <i>Zea mays</i>                | Maize                                         | Masara            | BUKHAN0277 |
| 22 | Asteraceae    | <i>Acanthospermum hispidum</i> | <b><u>BROAD LEAVES</u></b><br>Bristly starbur | Kashin yawo       | BUKHAN0136 |
| 23 | Amaranthaceae | <i>Amaranthus hybridus</i>     | Smooth amaranth                               | Alayyahu          | BUKHAN0020 |
| 24 | Amaranthaceae | <i>Amaranthus spinosus</i>     | Spiny amaranth                                | Zakibanza         | BUKHAN0279 |
| 25 | Amaranthaceae | <i>Amaranthus viridis</i>      | Slender amaranth                              |                   | BUKHAN0279 |
| 26 | Asteraceae    | <i>Aspilia bussei</i>          |                                               |                   | BUKHAN0042 |
| 27 | Asteraceae    | <i>Bidens pilosa</i>           | Black-jack                                    |                   | BUKHAN0506 |
| 28 | Amaranthaceae | <i>Celosia leptostachya</i>    |                                               |                   | BUKHAN0690 |
| 29 | Amaranthaceae | <i>Cyathula prostrata</i>      | Prostrate pastureweed                         |                   | BUKHAN0691 |
| 30 | Commelinaceae | <i>Commelina benghalensis</i>  | Benghal dayflower                             |                   | BUKHAN0178 |
| 31 | Commelinaceae | <i>Commelina erecta</i>        | Whitemouth dayflower                          |                   | BUKHAN0274 |
| 32 | Malvaceae     | <i>Corchorus olitorius</i>     | Jute mallow                                   | Lalo              | BUKHAN0364 |
| 33 | Fabaceae      | <i>Crotalaria retusa</i>       | Rattle pod                                    | Birana            | BUKHAN0077 |
| 34 | Asteraceae    | <i>Ageratum conyzoides</i>     | Billygoat weed                                | Icen ciniki       | BUKHAN0145 |

|    |                |                                |                                    |               |            |
|----|----------------|--------------------------------|------------------------------------|---------------|------------|
| 35 | Fabaceae       | <i>Chamaecrista mimosoides</i> | Fishbone cassia                    |               | BUKHAN488  |
| 36 | Euphorbiaceae  | <i>Euphorbia heterophylla</i>  | Mexican fireplant                  |               | BUKHAN0055 |
| 37 | Euphorbiaceae  | <i>Euphorbia hirta</i>         | Asthma plant                       | Nonon kurciya | BUKHAN0053 |
| 38 | Euphorbiaceae  | <i>Euphorbia hyssopifolia</i>  | Hyssopleaf sandmat                 |               | BUKHAN0054 |
| 39 | Amaranthaceae  | <i>Gomphrena celosioides</i>   | Sessile weed                       | Kandiri       | BUKHAN0017 |
| 40 | Fabaceae       | <i>Indigofera spicata</i>      | Creeping indigo                    |               | BUKHAN0091 |
| 41 | Convolvulaceae | <i>Ipomoea asarifolia</i>      | Ginger-leaf morning-glory          |               | BUKHAN0152 |
| 42 | Convolvulaceae | <i>Ipomoea eriocarpa</i>       | Tiny morning glory                 |               | BUKHAN0153 |
| 43 | Convolvulaceae | <i>Ipomoea triloba</i>         | Aiea morning glory                 |               | BUKHAN0686 |
| 44 | Convolvulaceae | <i>Ipomoea repens</i>          | Creeping morning glory             |               | BUKHAN0155 |
| 45 | Asteraceae     | <i>Laggera aurita</i>          | Sticky blumea                      | Taba-taba     | BUKHAN0138 |
| 46 | Lamiaceae      | <i>Leucas martinicensis</i>    | <b><u>C.B.Cl.</u></b><br>Whitewort | Kanbarawo     | BUKHAN0176 |
| 47 | Rubiaceae      | <i>Mitracarpus villosus</i>    | Tropical girlepod                  | Gogamasu      | BUKHAN0284 |
| 48 | Fabaceae       | <i>Mimosa pudica</i>           | Shameplant                         |               | BUKHAN0191 |
| 49 | Solanaceae     | <i>Nicotiana rustica</i>       | Aztec tobacco                      |               | BUKHAN0687 |
| 50 | Portulacaceae  | <i>Portulaca quadrifida</i>    | Chicken weed                       | Fasa kunburi  | BUKHAN0313 |
| 51 | Fabaceae       | <i>Senn obtusifolia</i>        | Sickle pod                         | Tafasa        | BUKHAN0307 |
| 52 | Fabaceae       | <i>Senna occidentalis</i>      | Coffee senna                       | Rai-rai       | BUKHAN0073 |
| 53 | Solanaceae     | <i>Solanum lycopersicum</i>    | Tomato                             | Tumatir       | BUKHAN0367 |

|    |                |                                      |                                            |                   |            |
|----|----------------|--------------------------------------|--------------------------------------------|-------------------|------------|
| 54 | Rubiaceae      | <i>Spermacoce verticillata</i>       | Shrubby false<br>buttonweed                | Karya<br>garma    | BUKHAN0133 |
| 55 | Sphenocleaceae | <i>Sphenoclea zeylanica</i>          | Chickenspike                               |                   | BUKHAN0688 |
| 56 | Orobanchaceae  | <i>Striga hermonthica</i>            | Purple withweed                            | Kuduji            | BUKHAN0158 |
| 57 | Asteraceae     | <i>Synedrella nodiflora</i>          | Cinderella weed                            |                   | BUKHAN0533 |
| 58 | Faceae         | <i>Tephrosia linearis</i>            | Linear tephrosia                           |                   | BUKHAN0446 |
| 59 | Aizoaceae      | <i>Trianthema<br/>portulacastrum</i> | Desert horsepurslane                       | Daburin<br>Saniya | BUKHAN0565 |
| 60 | Asteraceae     | <i>Cyanthillium cinereum</i>         | Little ironweed                            | Shuwakar<br>daji  | BUKHAN0414 |
| 61 | Fabaceae       | <i>Vigna unguiculata</i>             | Cowpea                                     | Wake              | BUKHAN0099 |
| 62 | Cyperaceae     | <i>Cyperus difformis</i>             | <b><u>SEDGES</u></b><br>Variable flatsedge | Ayar rafi         | BUKHAN0535 |
| 63 | Cyperaceae     | <i>Cyperus esculentus</i>            | Tiger nut                                  | Aya               | BUKHAN0367 |
| 64 | Cyperaceae     | <i>Cyperus rotundus</i>              | Purple nutsedge                            |                   | BUKHAN0209 |
| 65 | Cyperaceae     | <i>Cyperus iria</i>                  | Rice flat sedge                            |                   | BUKHAN0319 |
| 66 | Cyperaceae     | <i>Fuirena ciliaris</i>              | Umbrella sedge                             |                   | BUKHAN0221 |
| 67 | Cyperaceae     | <i>Kyllinga pumila</i>               | Low spikesedge                             |                   | BUKHAN0217 |
| 68 | Cyperaceae     | <i>Kyllinga squamulata</i>           | Asian spikesedge                           |                   | BUKHAN0689 |

*Identified by, Ibrahim Shu'aibu*

*Sign*



Date 18<sup>th</sup> May, 2024
